# Supplementary material
Source: Springer Nature journal article supplement (https://www.springermedizin.de/resource/supplementary/12885_2011_2906_MOESM1_ESM.pdf/9462288)

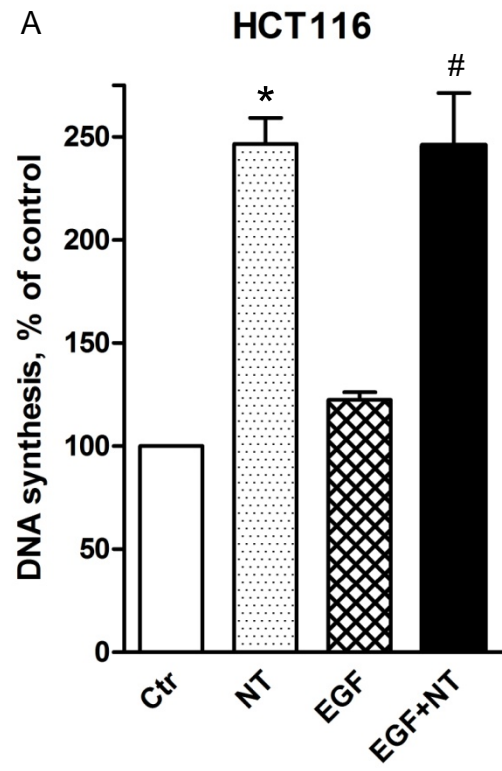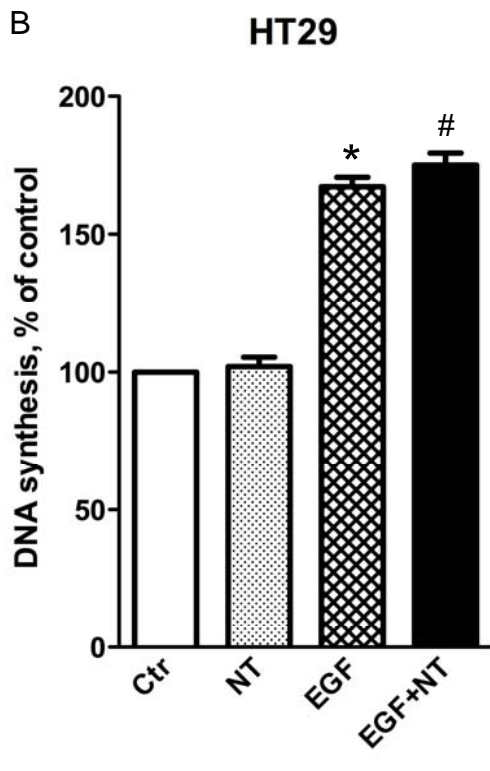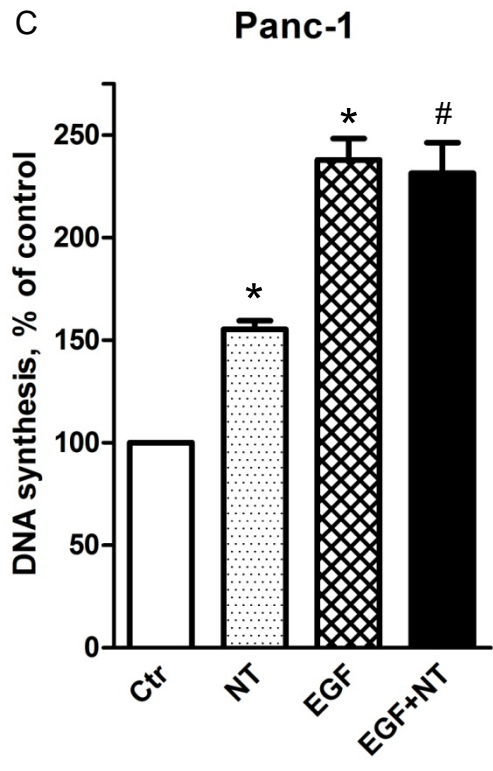

Supplement: MOESM1 [file 9462288]
